# Supplementary material
Source: publisher figshare collection journal article supplement (https://gsajournals.figshare.com/articles/dataset/_/13347677)
Supplement: Supplementary file 1 [file 1]

## Sheet: Reagents Table
Data type	Experimental species	Symbol/name used in publication	Source – public	Source – published	Source – unpublished	Identifiers	New reagent	Comments
Data type (mandatory) Duplicate rows as needed. Order is flexible, but row titles must be preserved.	Experimental species (mandatory, "NA" okay)	Symbol/name used in publication (mandatory)	Source – public [stock center; company, data repository] (one of D,E,F mandatory)	Source -- published [PMID or 'this paper'] (one of D,E,F mandatory)	Source – unpublished [description, incl. lab of origin] (one of D,E,F mandatory)	Identifiers [format as ID_source:identifier] Separate multiple entries with semi-colon, space	New reagent (mandatory for new entities) Description, progenitor(s)	Comments (optional) Genotypes, purpose of reagent, additional information
gene (source not applicable)	D. melanogaster	piwi	NA	NA	NA
genetic reagent (in whole organism)	D. melanogaster	y[1] w[67c23]; P{y[+t7.7]=CaryP}attP2	Bloomington Drosophila Stock Center			BDSC:8622; RRID:BDSC_8622		3rd chromosome attP docking site for phiC31 integrase-mediated transformation; cyto site 68A4
genetic reagent (in whole organism)	D. melanogaster	w[1118]/Dp(1;Y)y[+]; CyO/nub[1] b[1] sna[Sco] lt[1] stw[3]; MKRS/TM6B, Tb[1]	Bloomington Drosophila Stock Center			BDSC:3703; RRID:BDSC_3703		double balancer (Sco/Cyo; Sb/TM6B)
genetic reagent (in whole organism)	D. melanogaster	w[*]; P{w[+mC]=GAL4-Hsp70.PB}2	Bloomington Drosophila Stock Center			BDSC:2077; RRID:BDSC_2077		heatshock-inducible Gal4
genetic reagent (in whole organism)	D. melanogaster	y[1] w[*]; P{w[+mC]=tubP-GAL4}LL7/TM3, Sb[1] Ser[1]	Bloomington Drosophila Stock Center			BDSC:5138; RRID:BDSC_5138		Expresses GAL4 ubiquitously under the control of the alphaTub84B promoter
genetic reagent (in whole organism)	D. melanogaster	EGFP-Piwi(WT)		PMID: 23392610
genetic reagent (in whole organism)	D. melanogaster	EGFP-Piwi(YK)		PMID: 23392610
genetic reagent (in whole organism)	D. melanogaster	w[1118]; +; UASp:dam-myc,w+/TM6B	BestGene	this paper			Progenitors: vector pPW_Dam-myc; BDSC:8622	UASp:dam-myc
genetic reagent (in whole organism)	D. melanogaster	w[1118]; +; UASp:dam-myc-piwi(WT),w+/TM6B	BestGene	this paper			Progenitors: vector pPW_Dam-myc-Piwi(WT); BDSC:8622	UASp:dam-myc-piwi(WT)
genetic reagent (in whole organism)	D. melanogaster	w[1118]; +; UASp:dam-myc-piwi(YK),w+/TM6B	BestGene	this paper			Progenitors: vector pPW_Dam-myc-Piwi(YK); BDSC:8622	UASp:dam-myc-piwi(YK)
genetic reagent (in whole organism)	D. melanogaster	w[1118]; +; UASp:myc-piwi(WT),w+/TM6B	BestGene	this paper			Progenitors: vector pPW_myc-Piwi(WT); BDSC:8622	UASp:myc-piwi(WT)
genetic reagent (in whole organism)	D. melanogaster	w[1118]; +; UASp:myc-piwi(YK),w+/TM6B	BestGene	this paper			Progenitors: vector pPW_myc-Piwi(YK); BDSC:8622	UASp:myc-piwi(YK)
genetic reagent (in whole organism)	D. melanogaster	w[1118]; hs-GAL4/CyO; UASp:dam-myc,w+/TM6B		this paper			Progenitors: fly line UASp:Dam-myc; BDSC:2077	hs-GAL4; UASp:dam-myc
genetic reagent (in whole organism)	D. melanogaster	w[1118]; hs-GAL4/CyO; UASp:dam-myc-piwi(WT),w+/TM6B		this paper			Progenitors: fly line UASp:Dam-myc-Piwi(WT); BDSC:2077	hs-GAL4; UASp:dam-myc-piwi(WT)
genetic reagent (in whole organism)	D. melanogaster	w[1118]; hs-GAL4/CyO; UASp:dam-myc-piwi(YK),w+/TM6B		this paper			Progenitors: fly line UASp:Dam-myc-Piwi(YK); BDSC:2077	hs-GAL4; UASp:dam-myc-piwi(YK)
genetic reagent (in whole organism)	D. melanogaster	w[1118]; hs-GAL4/CyO; UASp:myc-piwi(WT),w+/TM6B		this paper			Progenitors: fly line UASp:myc-Piwi(WT); BDSC:2077	hs-GAL4; UASp:myc-piwi(WT)
genetic reagent (in whole organism)	D. melanogaster	w[1118]; hs-GAL4/CyO; UASp:myc-piwi(YK),w+/TM6B		this paper			Progenitors: fly line UASp:myc-Piwi(YK); BDSC:2077	hs-GAL4; UASp:myc-piwi(YK)
genetic reagent (in whole organism)	D. melanogaster	w[1118]; +; UASp:dam-myc,w+/P{w[+mC]=tubP-GAL4}LL7		this paper			Progenitors: fly line UASp:Dam-myc; BDSC:5138	tub-GAL4; UASp:dam-myc - embryonic lethal
genetic reagent (in whole organism)	D. melanogaster	w[1118]; +; UASp:dam-myc-piwi(WT),w+/P{w[+mC]=tubP-GAL4}LL7		this paper			Progenitors: fly line UASp:Dam-myc-Piwi(WT); BDSC:5138	tub-GAL4; UASp:dam-myc-piwi(WT) - embryonic lethal
genetic reagent (in whole organism)	D. melanogaster	w[1118]; +; UASp:dam-myc-piwi(YK),w+/P{w[+mC]=tubP-GAL4}LL7		this paper			Progenitors: fly line UASp:Dam-myc-Piwi(YK); BDSC:5138	tub-GAL4; UASp:dam-myc-piwi(YK) - embryonic lethal
genetic reagent (in whole organism)	D. melanogaster	w[1118]; +; UASp:myc-piwi(WT),w+/P{w[+mC]=tubP-GAL4}LL7		this paper			Progenitors: fly line UASp:myc-Piwi(WT); BDSC:5138	tub-GAL4; UASp:myc-piwi(WT)
genetic reagent (in whole organism)	D. melanogaster	w[1118]; +; UASp:myc-piwi(YK),w+/P{w[+mC]=tubP-GAL4}LL7		this paper			Progenitors: fly line UASp:myc-Piwi(YK); BDSC:5138	tub-GAL4; UASp:myc-piwi(YK)
antibody	NA	anti-myc	Cell Signalling			Cell Signalling: 9B11		1:1000 dilution
antibody	NA	anti-mouse (goat), Alexa Fluor® 488	ThermoFisher Scientific			ThermoFisher		1:400 dilution
recombinant DNA reagent	NA	pCa4B2G_myc-Piwi (plasmid)		PMID: 23297219				Piwi with N-term myc-tag
recombinant DNA reagent	NA	pLgw_RFC1-V5-EcoDam (plasmid)		PMID: 10748524
recombinant DNA reagent	NA	pENTR (Gateway vector) (plasmid)	GenBank			GenBank: GU931384.1
recombinant DNA reagent	NA	pPW (Gateway vector) (plasmid)	Drosophila Genomics Resource Center			DGRC:1130
recombinant DNA reagent	NA	pENTR_Dam-myc (plasmid)		this paper			Progenitors: pLgw_RFC1-V5-EcoDam; Gateway vector pENTR
recombinant DNA reagent	NA	pENTR_Dam-myc-Piwi(WT) (plasmid)		this paper			Progenitors: pCa4B2G_myc-Piwi; pENTR_Dam-myc
recombinant DNA reagent	NA	pENTR_Dam-myc-Piwi(YK) (plasmid)		this paper			Progenitors: pENTR_Dam-myc-Piwi(WT)	QuikChange reaction: Piwi Y551L, K555E mutations
recombinant DNA reagent	NA	pENTR_myc-Piwi(WT) (plasmid)		this paper			Progenitors: pENTR_Dam-myc-Piwi(WT); Gateway vector pENTR
recombinant DNA reagent	NA	pENTR_myc-Piwi(YK) (plasmid)		this paper			Progenitors: pENTR_Dam-myc-Piwi(YK); Gateway vector pENTR	Piwi Y551L, K555E mutations
recombinant DNA reagent	NA	pPW_Dam-myc (plasmid)		this paper			Progenitors: pENTR_Dam-myc; Gateway vector pPW
recombinant DNA reagent	NA	pPW_Dam-myc-Piwi(WT) (plasmid)		this paper			Progenitors: pENTR_Dam-myc-Piwi(WT); Gateway vector pPW
recombinant DNA reagent	NA	pPW_Dam-myc-Piwi(YK) (plasmid)		this paper			Progenitors: pENTR_Dam-myc-Piwi(YK); Gateway vector pPW	Piwi Y551L, K555E mutations
recombinant DNA reagent	NA	pPW_myc-Piwi(WT) (plasmid)		this paper			Progenitors: pENTR_myc-Piwi(WT); Gateway vector pPW
recombinant DNA reagent	NA	pPW_myc-Piwi(YK) (plasmid)		this paper			Progenitors: pENTR_myc-Piwi(YK); Gateway vector pPW	Piwi Y551L, K555E mutations
sequence-based reagent	DNA oligo	myc-Piwi-XbaI_F	Integrated DNA Technologies	this paper		GAT CTC TAG AAT GGC TGA TGA TCA TAT GGA GCA AAA GCT TAT T		myc-Piwi cloning primer
sequence-based reagent	DNA oligo	Piwi-SpeI_R	Integrated DNA Technologies	this paper		GAT CAC TAG TTT ATA GAT AAT AAA ACT TCT TTT CGA GCG CGT TTT GCG G		myc-Piwi cloning primer
sequence-based reagent	DNA oligo	Dam(-NsiI)_up	Integrated DNA Technologies	this paper		GCA TGG CGC GCG CAG ATG ATG CTT CCG TCG TCT ATT GCG ATC CGC C		NsiI removal from Dam
sequence-based reagent	DNA oligo	Dam(-NsiI)_low	Integrated DNA Technologies	this paper		GGC GGA TCG CAA TAG ACG ACG GAA GCA TCA TCT GCG CGC GCC ATG C		NsiI removal from Dam
sequence-based reagent	DNA oligo	Dam-NsiI_F	Integrated DNA Technologies	this paper		GAT CAT GCA TAA GAA AAA TCG CGC TTT TTT GAA GTG GGC AGG		Dam cloning primer
sequence-based reagent	DNA oligo	Dam-NsiI_R	Integrated DNA Technologies	this paper		GAT CAT GCA TTT TTT TCG CGG GTG AAA CGA CTC CTG G		Dam cloning primer
sequence-based reagent	DNA oligo	myc-NsiI_F	Integrated DNA Technologies	this paper		GAT CAT GCA TGC TGA TGA TCA TAT GGA GCA AAA GC		pENTR cloning primer
sequence-based reagent	DNA oligo	pENTR-NsiI_R	Integrated DNA Technologies	this paper		TAG CAT GCA TTG TTA CTT TTT GGC ACT CGC		pENTR cloning primer
sequence-based reagent	DNA oligo	Dam-XbaI_F	Integrated DNA Technologies	this paper		GAT CTC TAG AAT GAA GAA AAA TCG CGC TTT TTT GAA GTG GGC AGG		Dam-Piwi cloning primer
sequence-based reagent	DNA oligo	myc-SpeI_R	Integrated DNA Technologies	this paper		GAT CAC TAG TTT ACA GAT CTT CCT CGC TAA TAA GCT TTT GCT CC		Dam-Piwi cloning primer
sequence-based reagent	DNA oligo	YK_up	Integrated DNA Technologies	this paper		CTT TTT ATT TTA GAT TAT CAT CAA TCG AAA AGA GAG GAT AC		QuikChange primer for Piwi Y551L, K555E mutations
sequence-based reagent	DNA oligo	YK_low	Integrated DNA Technologies	this paper		GTA TCC TCT CTT TTC GAT TGA TGA TAA TCT AAA ATA AAA AG		QuikChange primer for Piwi Y551L, K555E mutations
sequence-based reagent	DNA oligo	AdRt	Integrated DNA Technologies	this paper		CTA ATA CGA CTC ACT ATA GGG CAG CGT GGT CGC GGC CGA GGA		DamID-seq adapter
sequence-based reagent	DNA oligo	AdRb	Integrated DNA Technologies	this paper		TCC TCG GCC GCG ACC		DamID-seq adapter
sequence-based reagent	DNA oligo	DamID_PCR	Integrated DNA Technologies	this paper		GGT CGC GGC CGA GGA TC		DamID-PCR primer
sequence-based reagent	DNA oligo	Dam_F2	Integrated DNA Technologies	this paper		ATG CAC CGC TGT CTG CGA CCG		Dam genotyping primer
sequence-based reagent	DNA oligo	pPW_R	Integrated DNA Technologies	this paper		GTT ATC AAG CTC CTC GAG TTA ACG TTA CG		Dam genotyping primer
sequence-based reagent	DNA oligo	Gal4_F	Integrated DNA Technologies	this paper		ATG AAG CTA CTG TCT TCT ATC GAA CAA GCA TG		Gal4 genotyping primer
sequence-based reagent	DNA oligo	Gal4_R	Integrated DNA Technologies	this paper		ACG TGT ATC TAT CCG TAA TCA TGG TCG G		Gal4 genotyping primer
sequence-based reagent	DNA oligo	pPW_F	Integrated DNA Technologies	this paper		CGG AGG TAT ACA CCT AGG CGG TAC C		myc-Piwi genotyping primer
sequence-based reagent	DNA oligo	Piwi_Int1_R	Integrated DNA Technologies	this paper		GGT GTC GAA TTC CGA AGA AAT GCG CG		myc-Piwi genotyping primer
sequence-based reagent	DNA oligo	Dam_F2	Integrated DNA Technologies	this paper		ATG CAC CGC TGT CTG CGA CCG		Dam-Piwi genotyping primer
sequence-based reagent	DNA oligo	Piwi_Int1_R	Integrated DNA Technologies	this paper		GGT GTC GAA TTC CGA AGA AAT GCG CG		Dam-Piwi genotyping primer
peptide, recombinant protein	Restriction enzyme	DpnI	New England BioLabs			NEB: R0176
peptide, recombinant protein	Restriction enzyme	DpnII	New England BioLabs			NEB: R0543
peptide, recombinant protein	Restriction enzyme	NsiI	New England BioLabs			NEB: R0127
peptide, recombinant protein	Restriction enzyme	SpeI-HF	New England BioLabs			NEB: R0133
peptide, recombinant protein	Restriction enzyme	XbaI	New England BioLabs			NEB: R0145
peptide, recombinant protein	NA	Q5 DNA polymerase	New England BioLabs			NEB: M0491
peptide, recombinant protein	NA	T4 DNA Ligase	New England BioLabs			NEB: M0202
peptide, recombinant protein	NA	Shrimp Alkaline Phosphatase	New England BioLabs			NEB: M0371
large-scale dataset	D. melanogaster	PIWI-associated piRNA in Drosophila melanogaster ovary	NCBI GEO	PMID: 1795205		NCBI GEO: GSE9138		PIWI-associated piRNA in Drosophila melanogaster ovary
large-scale dataset	D. melanogaster	Piwi-DamID-seq, Drosophila ovary	NCBI GEO	PMID: 28472469		NCBI GEO: GSE87346		Piwi-DamID-seq: Dam-only, Dam-Piwi(WT)
large-scale dataset	D. melanogaster	Piwi DamID-seq, Drosophila ovary	NCBI SRA database	this paper		NCBI SRA: PRJNA662571		Piwi-DamID-seq: Dam-only, Dam-Piwi(WT), Dam-Piwi(YK)
commercial assay	NA	Illumina				Illumina TruSeq ChIP Sample Preparation Kit
software, algorithm	NA	iDEAR		PMID: 27707796
	NA	Bowtie2		PMID: 22388286
	NA	UCSC RepeatMasker
	NA	Circos		PMID: 19541911
other	NA	VECTASHIELD	Vector Laboratories
Liu, Neuenkirchen et al. - Reagents Table
