# Supplementary material
Source: publisher figshare collection journal article supplement (https://gsajournals.figshare.com/articles/dataset/_/13347677)
Supplement: Supplementary file 3 [file 1]

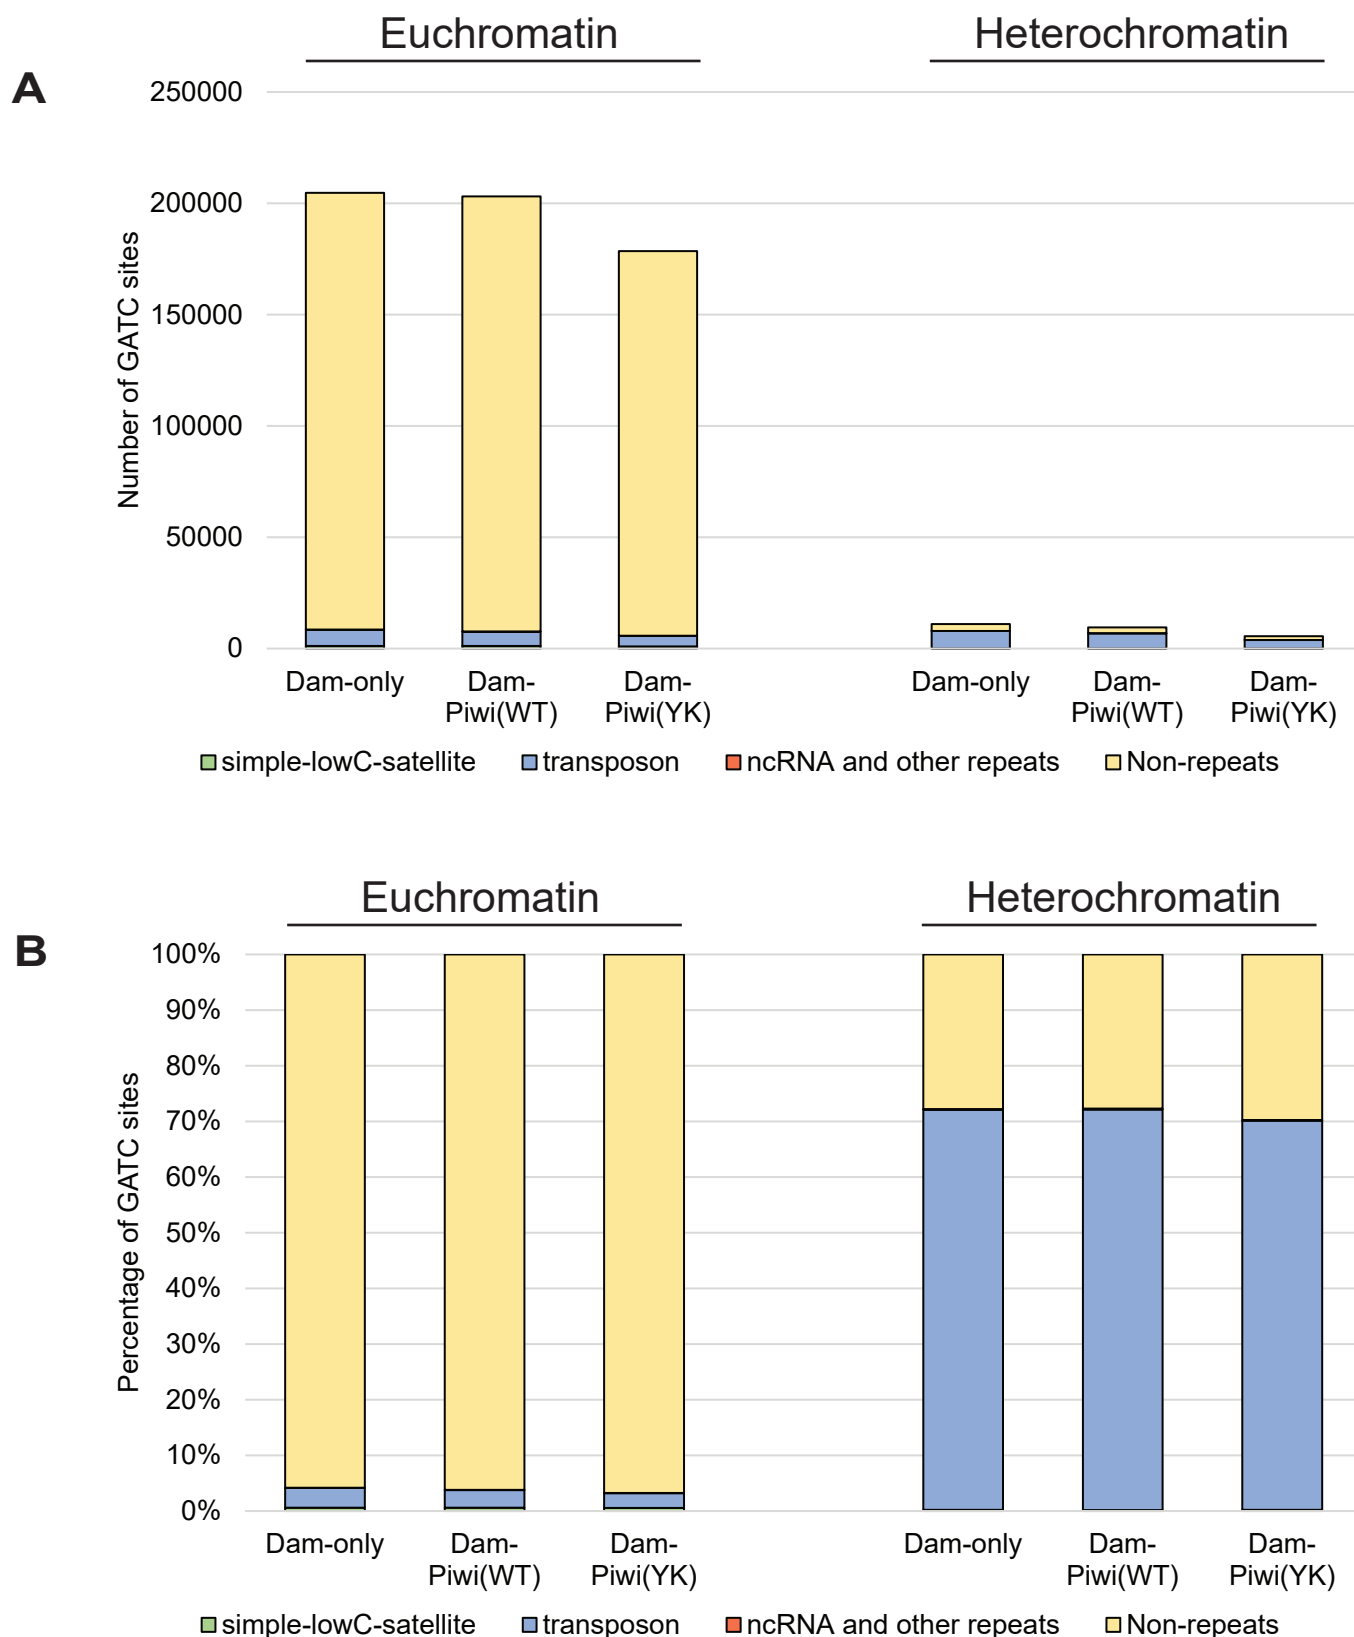

**Figure S3. Repeat annotation of modified GATC sites in euchromatin and heterochromatin.** The number and percentage of modified GATC sites is shown for simple, low-complexity, and satellite repeats (simple-lowC-satellite, green), transposon repeats (blue), ncRNA and other repeats (red), and non-repeats (yellow). (A) Total number of GATC sites (B) Percentage of GATC sites.
