# Supplementary material
Source: publisher figshare collection journal article supplement (https://gsajournals.figshare.com/articles/dataset/_/13347677)
Supplement: Supplementary file 4 [file 1]

**A**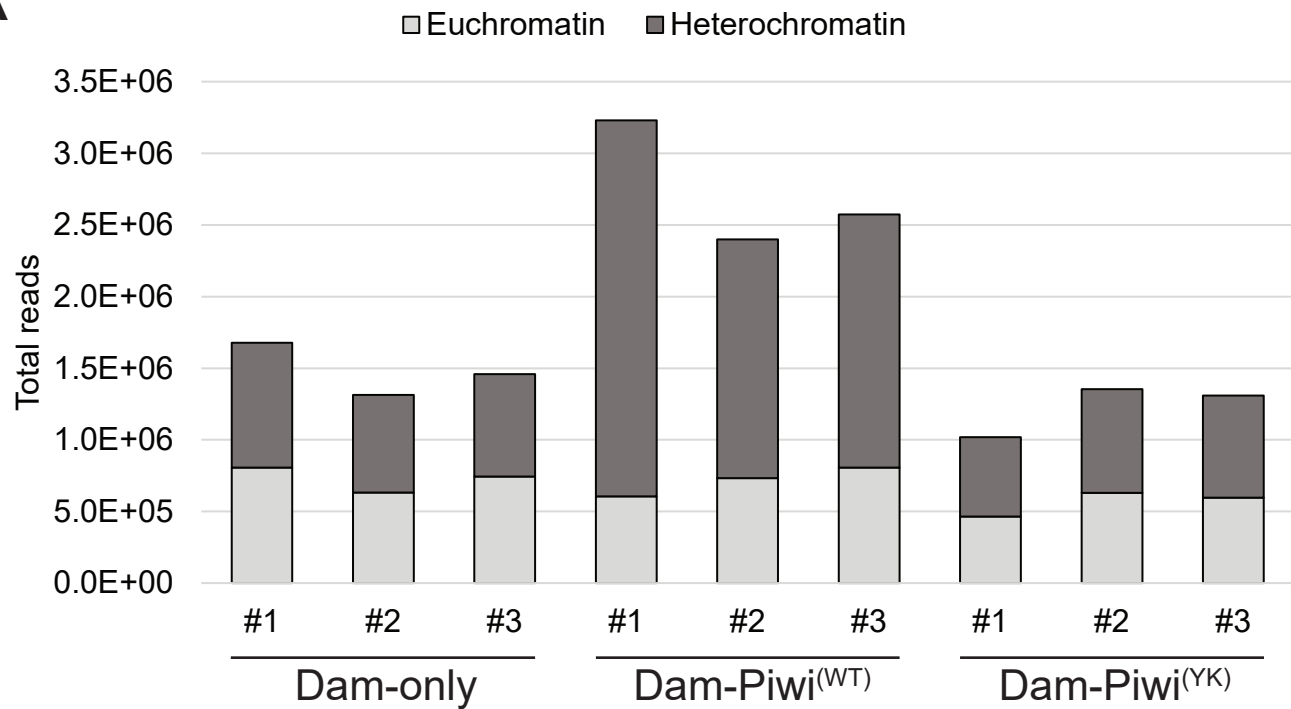**B**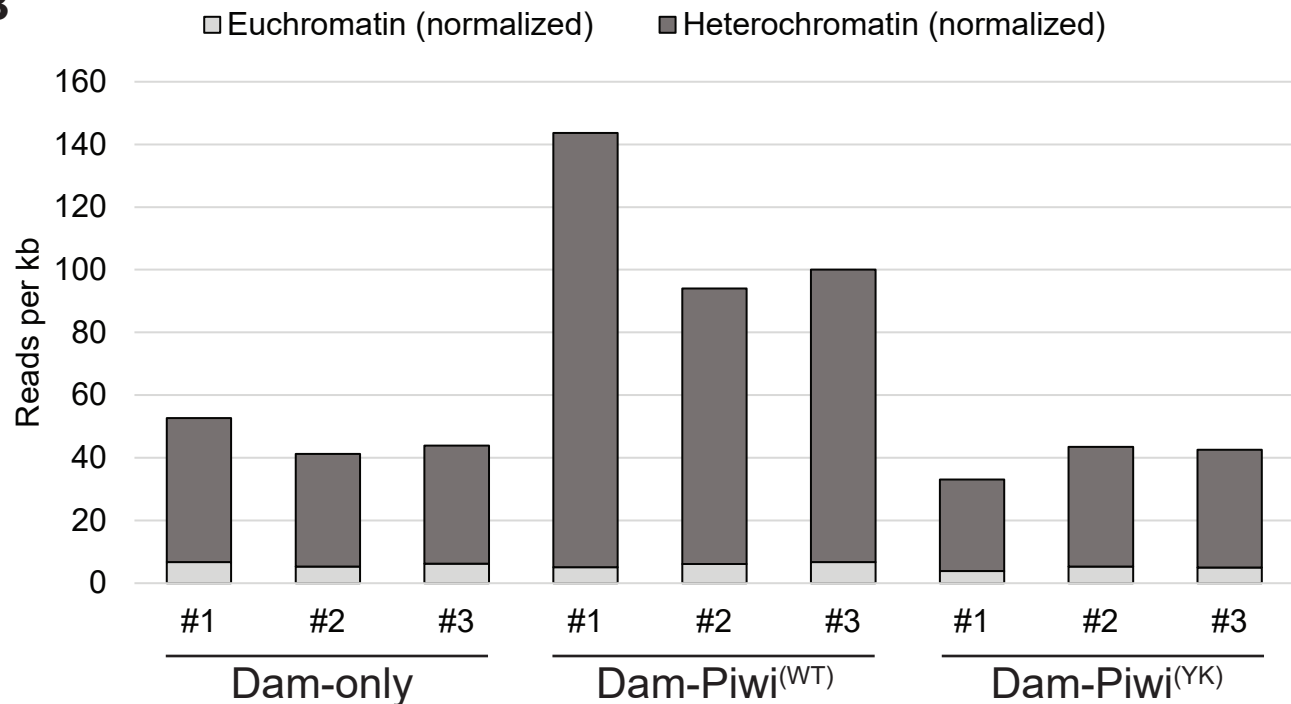

**Figure S2. Annotation of multi-mapped reads in each library in euchromatin and heterochromatin.** (A) Total, unnormalized reads. (B) Normalized per kb. Euchromatin is indicated in light gray and heterochromatin in dark gray.
